# Supplementary material for: Low-temperature fabrication of BTO-based relaxor ferroelectric thick films with multi-layered architecture
Source: Royal Society of Chemistry journal article supplement (doi:10.1039/d6ra02102f), 2026-05-18
Supplement: d6ra02102f2.pdf [file d6ra02102f2.pdf]

## Low-temperature fabrication of BTO-based relaxor ferroelectric thick films with multi-layered architecture

HongweiZhang<sup>a</sup>, WeibingMa<sup>a\*</sup>, ZhuoZhang<sup>a</sup>, NaiheYi<sup>a</sup> and JingNanHong<sup>a</sup>

<sup>a</sup>Key Laboratory of Advanced Ceramics and Machining Technology of Ministry of Education, Tianjin University, Tianjin 300072, China, maweibing@tju.edu.cn

The main raw materials used in this experiment are shown in Table S1.

Table S1 Raw materials used in the experiment

| Name                | Molecular Formula               | Purity | Manufacturer Information                                         |
|---------------------|---------------------------------|--------|------------------------------------------------------------------|
| Barium Carbonate    | BaCO <sub>3</sub>               | A.R.   | Shanghai Aladdin Chemical<br>Reagent Co., Ltd                    |
| Strontium Carbonate | SrCO <sub>3</sub>               | A.R.   | Shanghai Aladdin Chemical<br>Reagent Co., Ltd                    |
| Titanium Dioxide    | TiO <sub>2</sub>                | A.R.   | Shanghai Aladdin Chemical<br>Reagent Co., Ltd                    |
| Zirconium Dioxide   | ZrO <sub>2</sub>                | A.R.   | Tianjin Kemio Chemical Reagent<br>Co., Ltd                       |
| Sodium Carbonate    | Na <sub>2</sub> CO <sub>3</sub> | A.R.   | China National Pharmaceutical<br>Group Chemical Reagent Co., Ltd |
| Bismuth Trioxide    | Bi <sub>2</sub> O <sub>3</sub>  | A.R.   | Shanghai Aladdin Chemical<br>Reagent Co., Ltd                    |
| Zinc Oxide          | ZnO                             | A.R.   | Shanghai Aladdin Chemical<br>Reagent Co., Ltd                    |
| Boron Trioxide      | B <sub>2</sub> O <sub>3</sub>   | A.R.   | Shanghai Aladdin Chemical<br>Reagent Co., Ltd                    |

The main equipment used in this experiment is listed in Table S2.

Table S2 Main equipment used in this experiment

| Name                     | Model       | Manufacturer Information                            |
|--------------------------|-------------|-----------------------------------------------------|
| Precision Balance        | BSA2245S-CW | Sadolis Scientific Instruments Co., Ltd             |
| Planetary Ball Mill      | ND8-2L      | Nanjing Nanda Tianzun Electronics Co., Ltd          |
| Heating Magnetic Stirrer | DF-101S     | Tianjin Kono Instrument Equipment Co., Ltd          |
| Blast Drying Oven        | YLE-2000    | Tianjin Shunnuo Instrument Technology<br>Co., Ltd   |
| Box Furnace              | KF 1200     | Nanjing Boyuntang Instrument Technology<br>Co., Ltd |

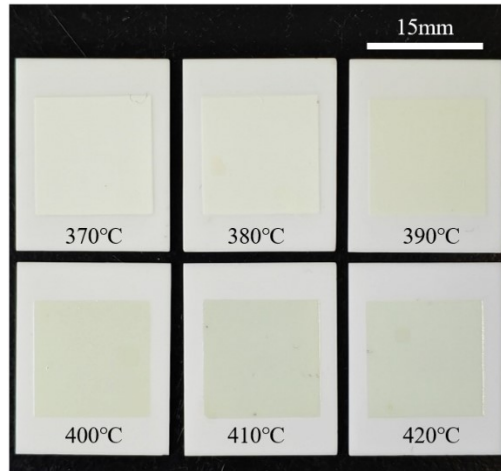

Figure S1 Pictures of the melting state of glass after different sintering temperatures

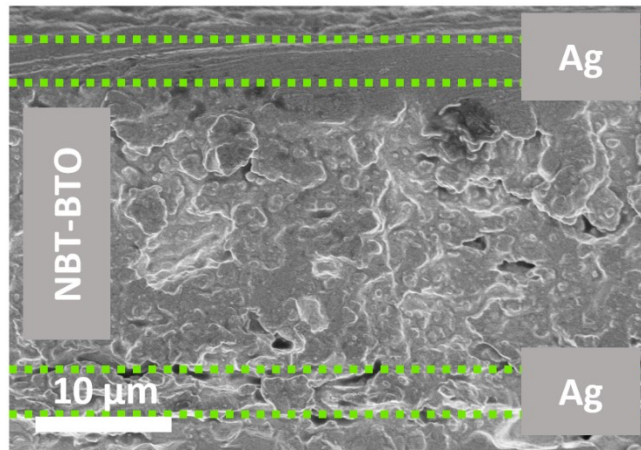

Figure S2 Cross-sectional SEM images of 0.3NBT-0.1Sr-0.2Zr thick film with 7 wt.% glass sintered at 900 °C

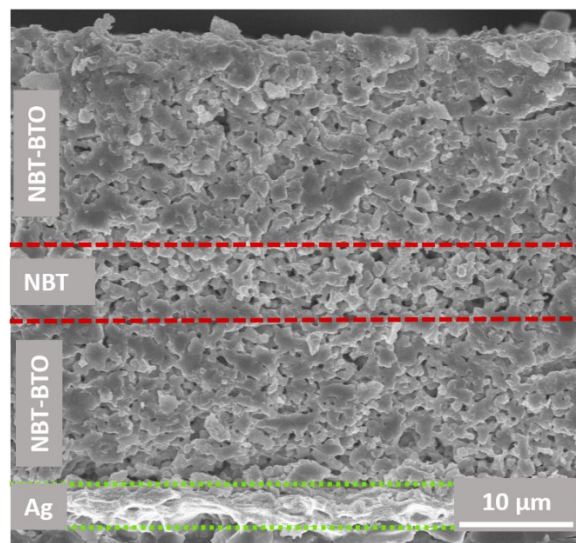

Figure S3 Cross-sectional SEM images of sandwiched multilayer ceramic thick film with 7 wt.% glass sintered at 900 °C
